# Supplementary material for: Vibration sensitivity found inCaenorhabditis elegans
Source: Oxford University Press journal article supplement (doi:10.1242/jeb.178947), 2018-01-01
Supplement: jeb178947supp.pdf [file jeb178947supp.pdf]

### Supplementary Information

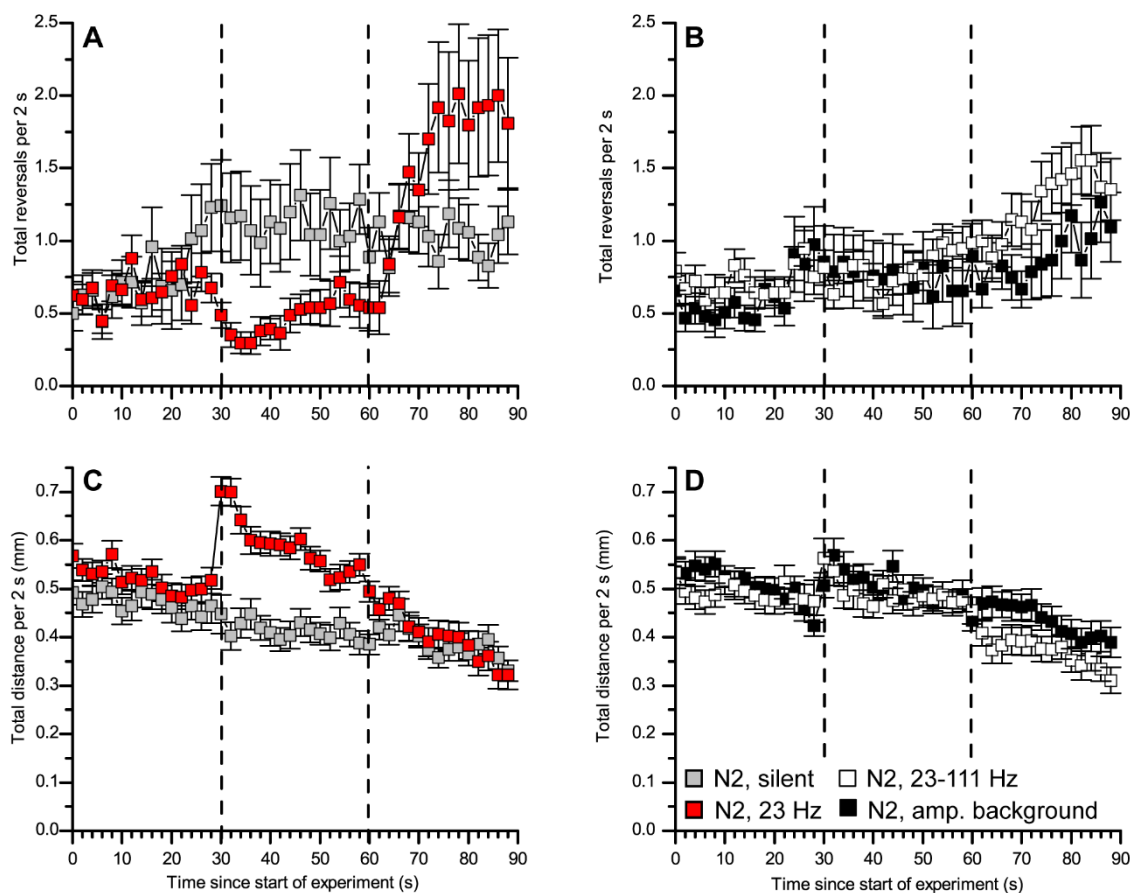

**Fig. S1. Responses over time of wild-type (N2) strain worms to four vibration treatments.** (A) and (B) mean number of reversals in a 2 second period, (C) and (D) mean total distance in a 2 second period. Grey is silent treatment (also shown in Fig. 2B and D, N=70), red is the 23 Hz treatment (also shown in Fig. 2B and D, N=74), black is the amplified background treatment (N=75) and white is the frequency-modulated 23-111 Hz treatment (N=76). Error bars give s.e.m. Dashed lines separate treatment period (30-60 seconds) from control periods.

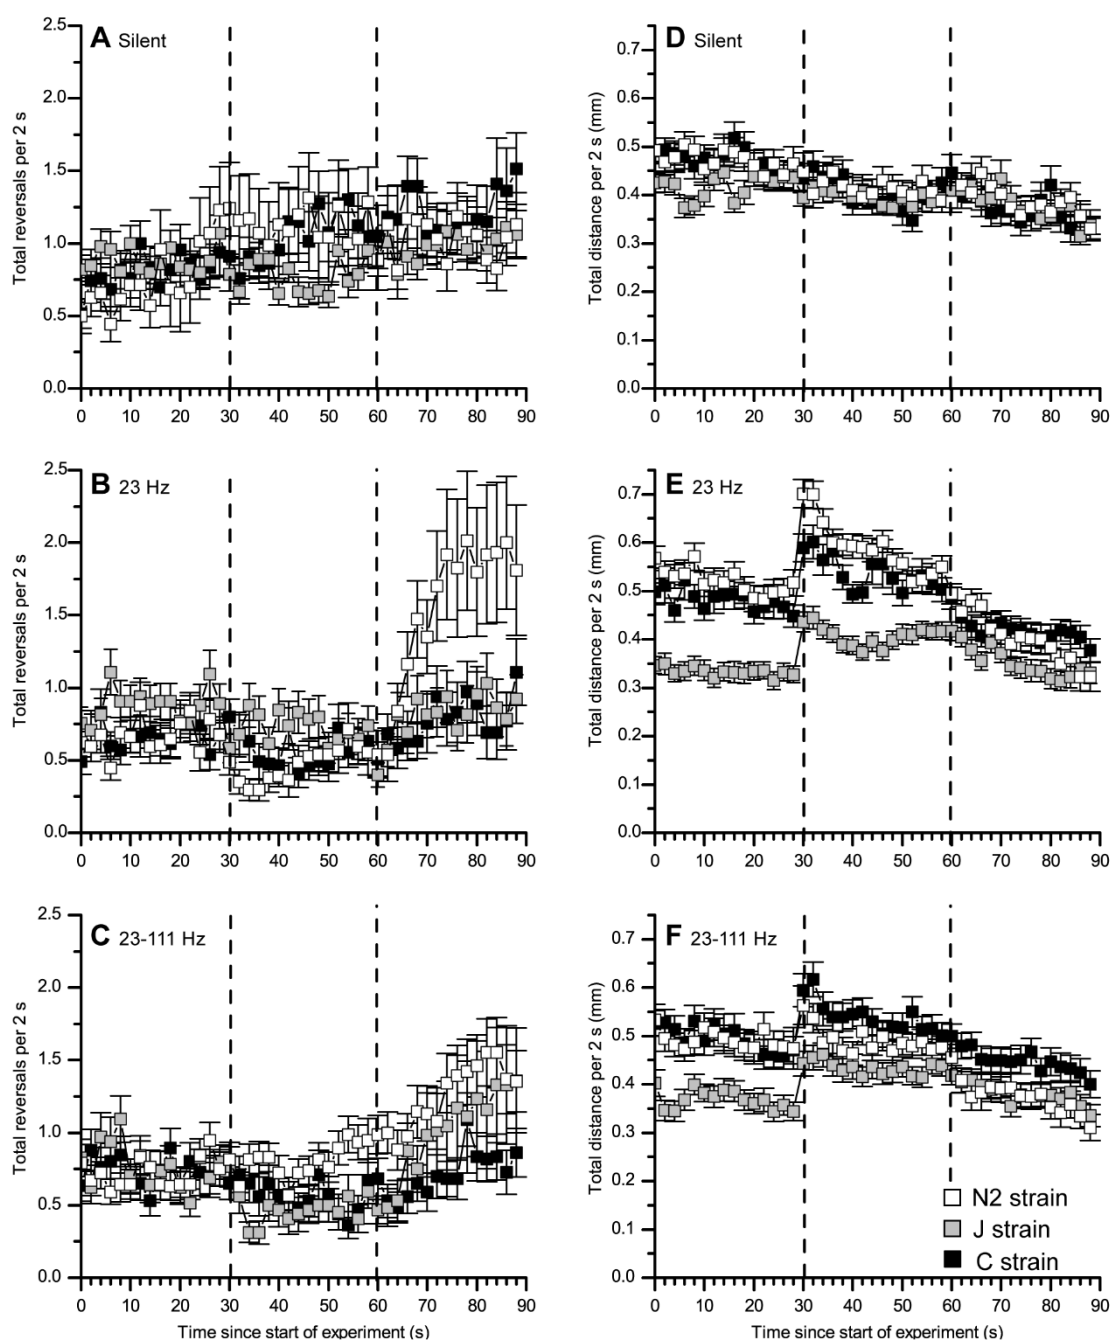

**Fig. S2. Responses over time of wild-type (N2) and mechanosensory neurons deficient [C strain, *mec-3(e1338)*] and the ciliated neurons deficient [J strain, *daf-19(m86);daf-12(sa204)*] strain worms to three vibration treatments. (A-C) Mean number of reversals in a 2 second period, (D-F) mean total distance in a 2 second period. (A) and (D) silent treatment, (B) and (E) 23 Hz treatment, (C) and (F) frequency-modulated 23-111 Hz treatment. White gives wild-type (N2) strain, grey gives J strain (*daf-19;daf-12* mutant) and black gives C strain (*mec-3* mutant). Error bars give s.e.m. Dashed lines separate treatment period (30-60 seconds) from control periods. All data are also shown in Fig. 2B and D and Fig. 3B, C, E and F.**

**Table S1. Full data table from this study.** The number of reversals and total distance travelled by all tracked worms over all 12 vibration treatments, three 30 second periods and three strains are given. A summary table of the average number of reversals and average total distance for each 30 second period is also given, as well as the outputs from the Mann-Whitney ranked sum tests.

[Click here to Download Table S1](#)

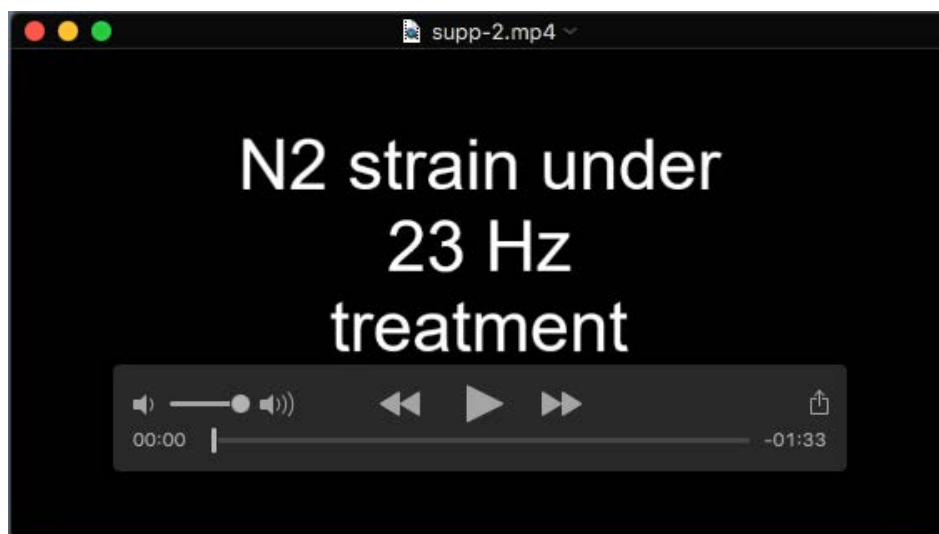

**Movie 1. Behavioural tracks of wild-type (N2) strain worm under 23 Hz treatment.** Movie shows tracks of four of the 74 worms tracked under the 23 Hz vibration treatment. First 30 seconds is control period 1 (no vibration, green), middle 30 seconds is the vibration treatment at 23 Hz (orange) and last 30 seconds is control period 2 (no vibration, purple). Only worms that moved within the area of interest for the full 90 seconds were tracked. White circle in middle has 2 mm diameter.
